# Supplementary material for: A novel condition of mild electrical stimulation exerts immunosuppression via hydrogen peroxide production that controls multiple signaling pathway
Source: PubMed Central journal article supplement (PMC7307747; doi:10.1371/journal.pone.0234867), 2020-06-22
Supplement: pone.0234867.s001.pdf [file pone.0234867.s001.pdf]

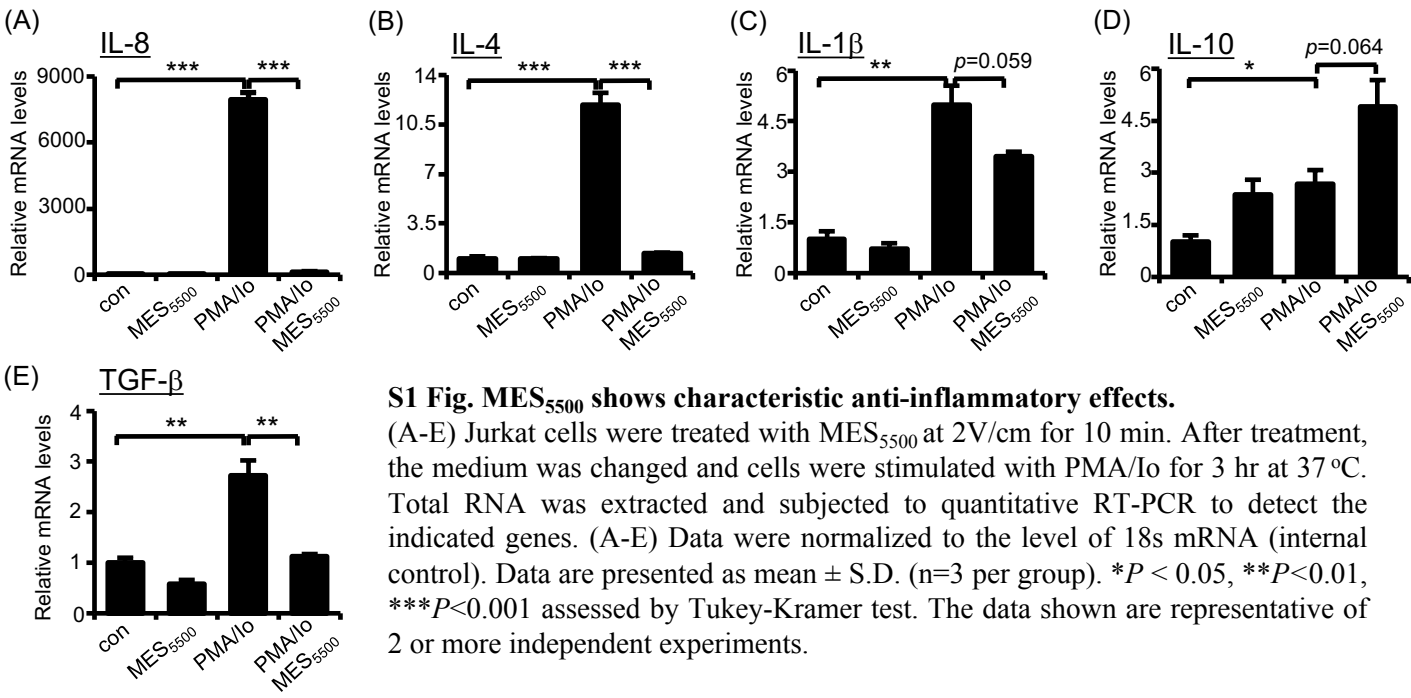

**S1 Fig. MES<sub>5500</sub> shows characteristic anti-inflammatory effects.**

(A-E) Jurkat cells were treated with MES<sub>5500</sub> at 2V/cm for 10 min. After treatment, the medium was changed and cells were stimulated with PMA/Io for 3 hr at 37 °C. Total RNA was extracted and subjected to quantitative RT-PCR to detect the indicated genes. (A-E) Data were normalized to the level of 18s mRNA (internal control). Data are presented as mean  $\pm$  S.D. (n=3 per group). \* $P < 0.05$ , \*\* $P < 0.01$ , \*\*\* $P < 0.001$  assessed by Tukey-Kramer test. The data shown are representative of 2 or more independent experiments.
