# Supplementary material for: A novel condition of mild electrical stimulation exerts immunosuppression via hydrogen peroxide production that controls multiple signaling pathway
Source: PubMed Central journal article supplement (PMC7307747; doi:10.1371/journal.pone.0234867), 2020-06-22
Supplement: pone.0234867.s002.pdf [file pone.0234867.s002.pdf]

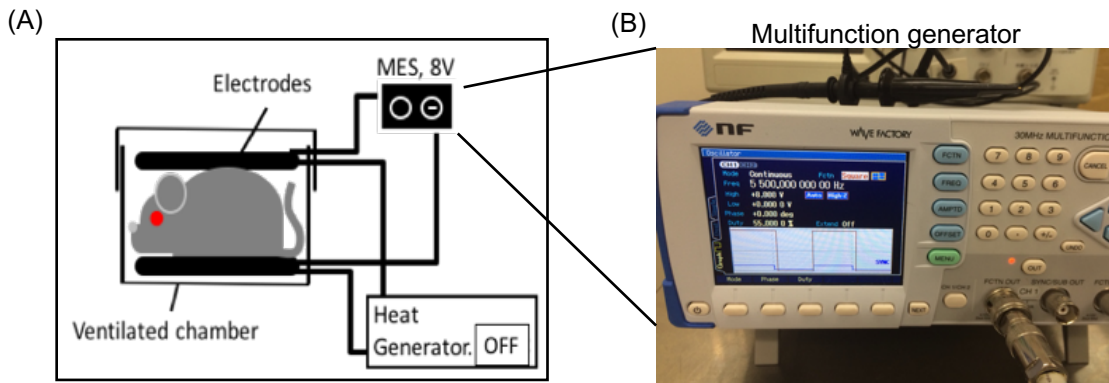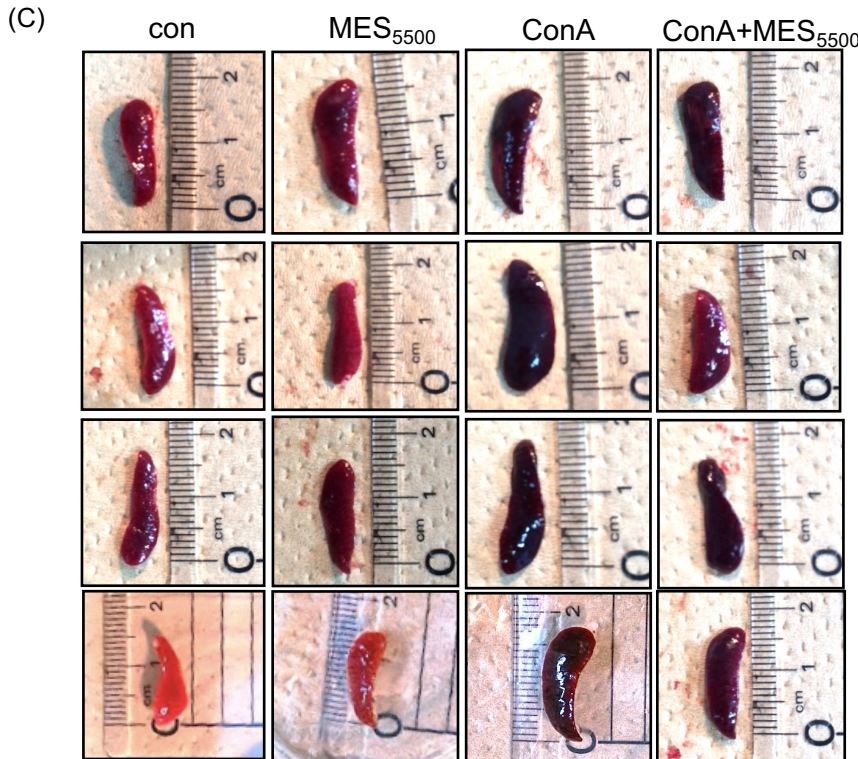

**S2 Fig. MES<sub>5500</sub> reduces spleen size and inflammation in ConA-treated mice.**

(A) Schematic diagram of *in vivo* MES treatment. (B) Image of multifunction generator. (C) BALB/c mice were treated with MES<sub>5500</sub> for 20 min, and injected with ConA (i.v.; 1 mg/kg). Mice were treated again with MES<sub>5500</sub>. Four hr later, mice were euthanized, and spleen was collected. Mouse spleen sizes are shown.
