# Supplementary material for: A novel condition of mild electrical stimulation exerts immunosuppression via hydrogen peroxide production that controls multiple signaling pathway
Source: PubMed Central journal article supplement (PMC7307747; doi:10.1371/journal.pone.0234867), 2020-06-22
Supplement: pone.0234867.s003.pdf [file pone.0234867.s003.pdf]

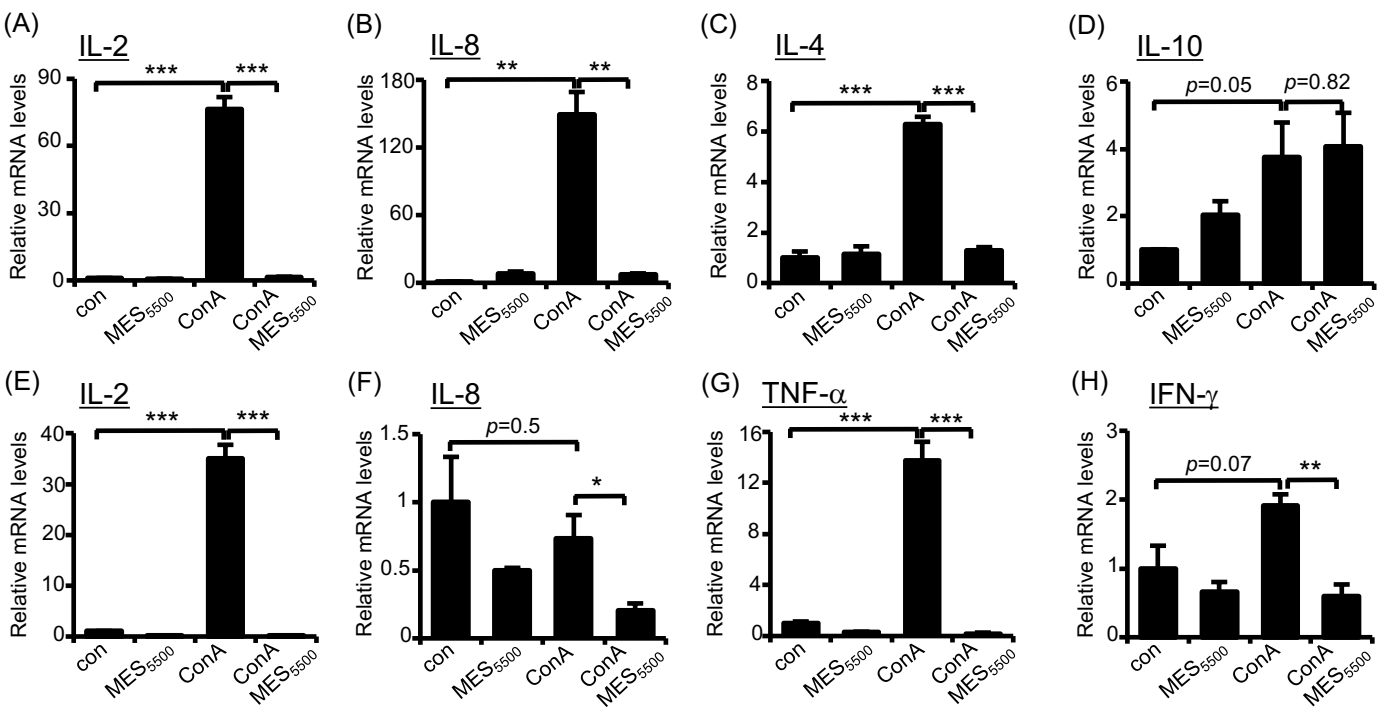

**S3 Fig. MES<sub>5500</sub> suppresses ConA-stimulated overexpression of inflammatory cytokines in Jurkat T cells and primary splenocytes.**

(A-D) Jurkat T cells and (E-H) primary splenocytes were treated with MES<sub>5500</sub> at 2V/cm for 10 min. After treatment, the medium was changed and cells were stimulated with ConA (5 μg/ml) for 3 hr at 37°C. Total RNA was extracted and subjected to quantitative RT-PCR to detect the indicated genes. (A-D) Data were normalized to the level of 18s mRNA (internal control). Data are presented as mean ± S.D. (n=3 per group). \*\**P*=0.01, \*\*\**P*<0.001 assessed by Tukey-Kramer test. The data shown are representative of 2 or more independent experiments.
