# Supplementary material for: A novel condition of mild electrical stimulation exerts immunosuppression via hydrogen peroxide production that controls multiple signaling pathway
Source: PubMed Central journal article supplement (PMC7307747; doi:10.1371/journal.pone.0234867), 2020-06-22
Supplement: pone.0234867.s004.pdf [file pone.0234867.s004.pdf]

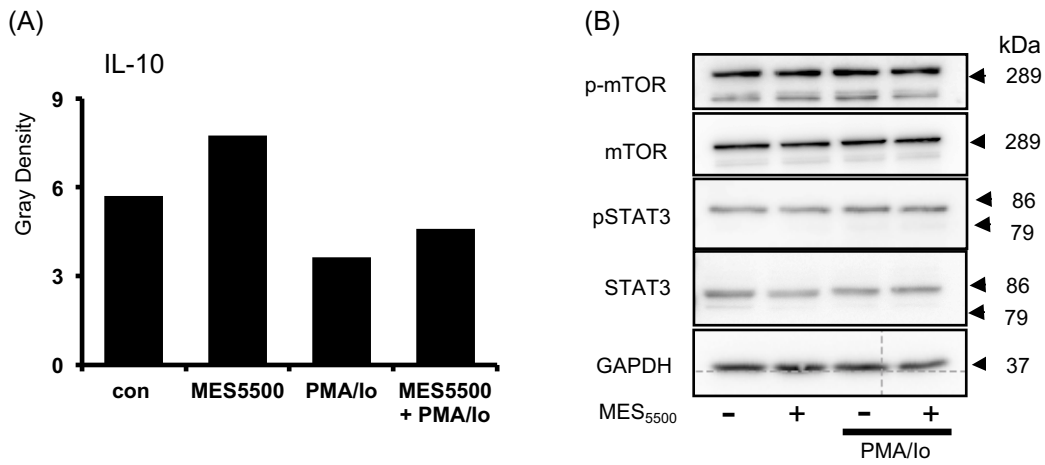

**S4 Fig. MES<sub>5500</sub> increases protein level of IL-10, but does not have effect on PI3K downstream molecules.** (A-B) Jurkat T cells were treated with MES<sub>5500</sub> at 2V/cm for 10 min. (A) After treatment, the medium was changed and cells were stimulated with PMA/Io for 6 hr at 37 °C, and PathScan analysis was performed according to manufacturer's protocol (*Cell Signaling Technology*). (B) Western blotting was performed on whole cells lysates from cells stimulated with PMA/Io for 3 hr at 37 °C.
