# Supplementary material for: A novel condition of mild electrical stimulation exerts immunosuppression via hydrogen peroxide production that controls multiple signaling pathway
Source: PubMed Central journal article supplement (PMC7307747; doi:10.1371/journal.pone.0234867), 2020-06-22
Supplement: pone.0234867.s005.pdf [file pone.0234867.s005.pdf]

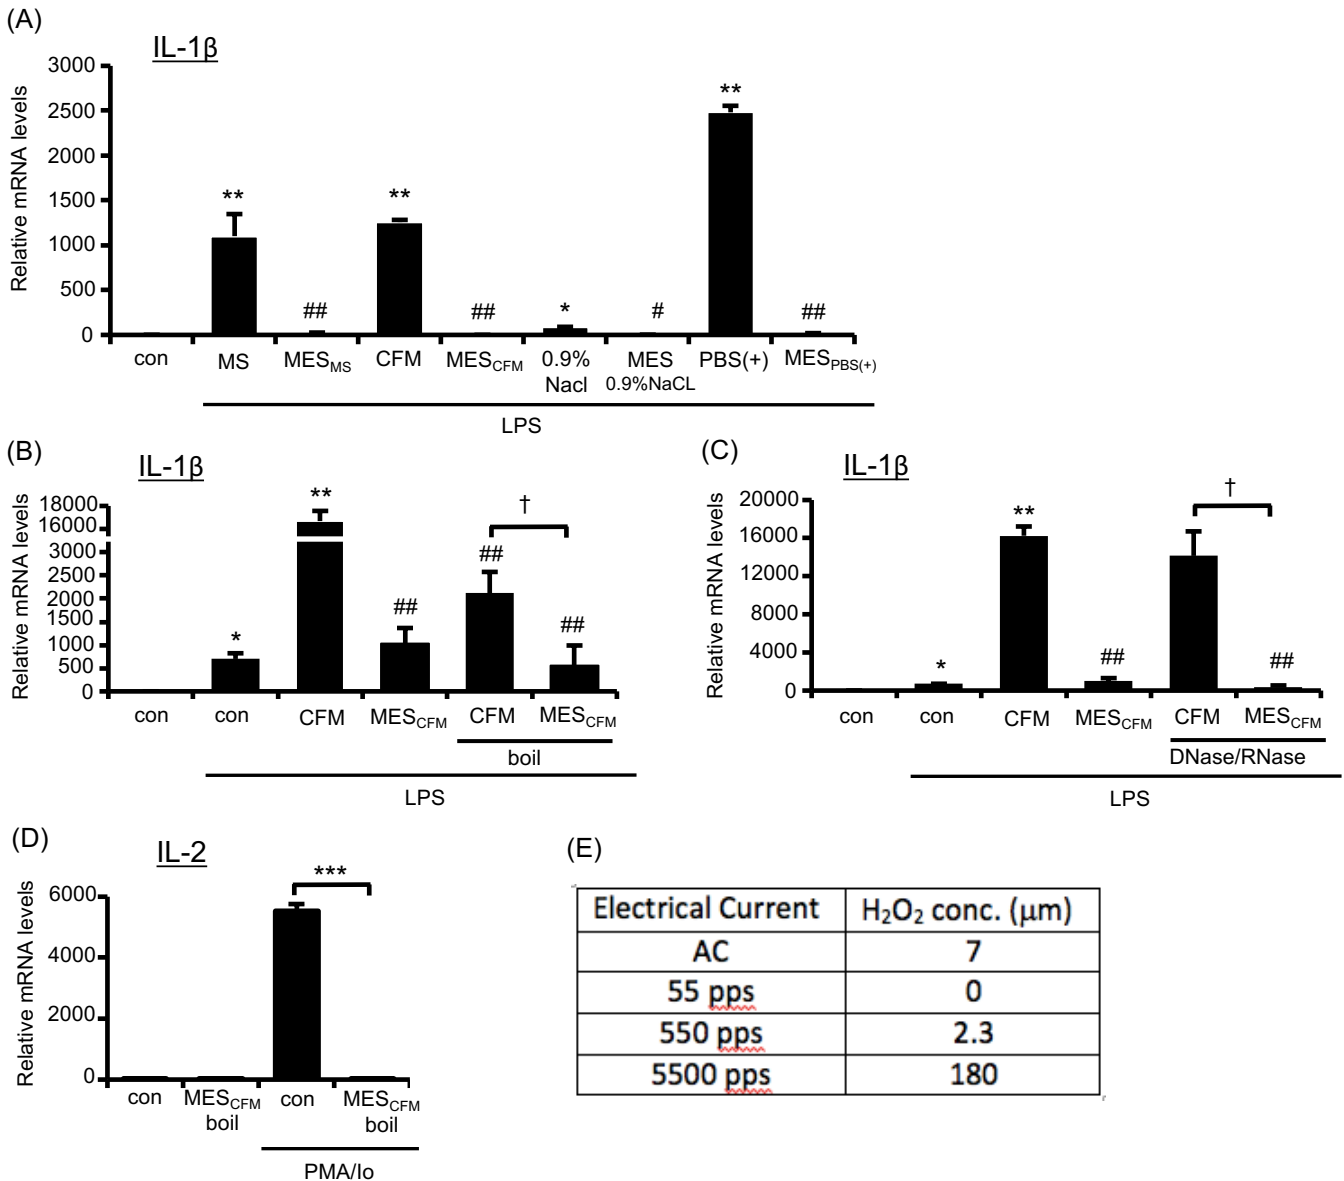

**S5 Fig. Compound responsible for anti-inflammatory effect of MES<sub>5500</sub> is independent on cell type, culture media.**

(A) MG6 cells with medium (MS), DMEM high glucose (CFM), 0.9 % NaCl and PBS(+) were treated with MES<sub>5500</sub> at 2 V/cm for 30 min. Then media were transferred to MG6 cells, which were cultured in serum-free media for 4 hr at 37 °C, and cells were stimulated with 100 ng/ml LPS for 4 hr at 37 °C. Total RNA was extracted and analyzed to detect IL-1 $\beta$  mRNA. (B, C) SHSY5Y cells were treated with MES<sub>5500</sub> at 2 V/cm for 30 min and were incubated for 4 hr at 37 °C without medium change. The supernatants from MES<sub>5500</sub> treated or non-treated cells were (B) boiled for 15 min at 100 °C, (C) treated with 2 mg/ml Dnase/Rnase for 30 min at 37 °C, and added to MG6 cells (2<sup>nd</sup> cells), which were cultured in serum-free media for 4 hr, and cells were stimulated with 100 ng/ml LPS for 4 hr. Total RNA of 2<sup>nd</sup> cells was extracted and analyzed to detect IL-1 $\beta$ . Data were normalized to the level of GAPDH (internal control). (D) Cell-free culture media was treated with MES<sub>5500</sub> for 10 min (MES<sub>CFM</sub>), and boiled. After cooling, MES<sub>CFM</sub> was added to Jurkat T cells for 10 min. The medium was changed and cells were stimulated with PMA/Io for 3 hr. Total RNA was extracted and analyzed to detect IL-2 mRNA levels. Data were normalized to the level of GAPDH (internal control). Data are presented as mean  $\pm$  S.D. (n=3 per group). \* $P$ <0.05, \*\* $P$ <0.01, non-treated vs. LPS-treated; # $P$ <0.05, ## $P$ <0.01, LPS-treated vs. MES<sub>5500</sub>; † $P$ <0.05, B and C as indicated. Data were assessed by ANOVA with Tukey-Kramer test. (E) H<sub>2</sub>O<sub>2</sub> concentration in cell media after 10 min of electrical stimulation with different currents. AC, alternating current.
