# Supplementary material for: A novel condition of mild electrical stimulation exerts immunosuppression via hydrogen peroxide production that controls multiple signaling pathway
Source: PubMed Central journal article supplement (PMC7307747; doi:10.1371/journal.pone.0234867), 2020-06-22
Supplement: pone.0234867.s006.pdf [file pone.0234867.s006.pdf]

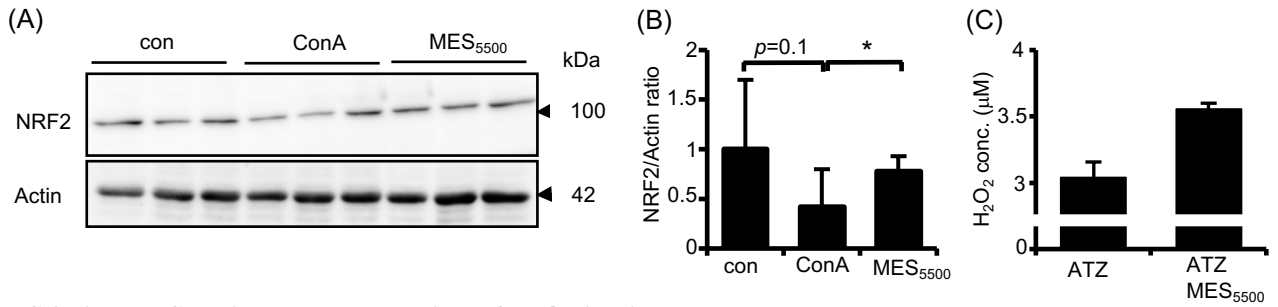

**S6 Fig. MES<sub>5500</sub> induces production of H<sub>2</sub>O<sub>2</sub> *in vivo*.**

(A) Immunoblotting of liver lysates isolated from BALB/c mice treated with MES<sub>5500</sub> and ConA. (B) Quantification of blots in (A). (C) BALB/c mice (6 weeks old) were injected with 3-amino-1,2,4-triazole (ATZ; 1g/kg; i.p.). After 24 h, mice were treated with MES<sub>5500</sub>. Blood serum was obtained to measure H<sub>2</sub>O<sub>2</sub> concentration. Data are presented as mean ± S.D. (n=4 for control group and n=4 for MES<sub>5500</sub>-treated group) assessed by Wilcoxon test. The data shown are representative of 2 or more independent experiments.
