# Supplementary material for: A novel condition of mild electrical stimulation exerts immunosuppression via hydrogen peroxide production that controls multiple signaling pathway
Source: PubMed Central journal article supplement (PMC7307747; doi:10.1371/journal.pone.0234867), 2020-06-22
Supplement: pone.0234867.s007.pdf [file pone.0234867.s007.pdf]

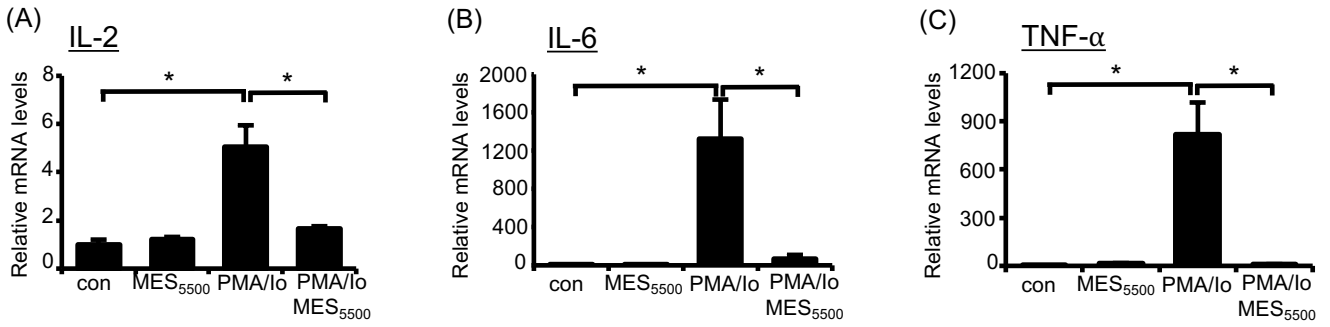

**S7 Fig. MES<sub>5500</sub> shows anti-inflammatory effect on HeLa cells.**

(A-C) HeLa cells were treated with MES<sub>5500</sub>, and stimulated with PMA/Io. Total RNA was extracted and analyzed to detect the indicated genes. Data were normalized to the level of 18s mRNA (internal control). Data are presented as mean ± S.D. (n=3 per group). \**P* < 0.05 assessed by Tukey-Kramer test. The data shown are representative of 2 or more independent experiments.
