# Supplementary material for: A novel condition of mild electrical stimulation exerts immunosuppression via hydrogen peroxide production that controls multiple signaling pathway
Source: PubMed Central journal article supplement (PMC7307747; doi:10.1371/journal.pone.0234867), 2020-06-22
Supplement: pone.0234867.s008.pdf [file pone.0234867.s008.pdf]

(A)

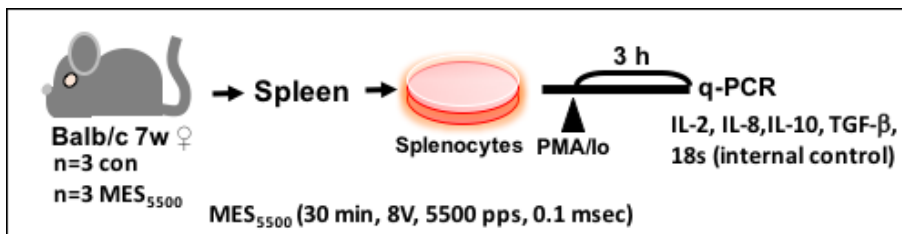

(B)

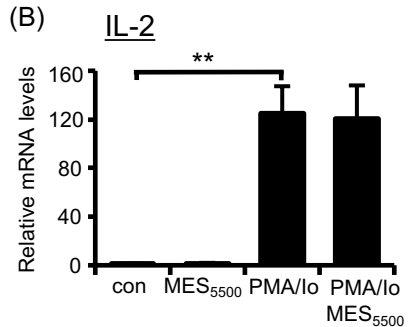

(C)

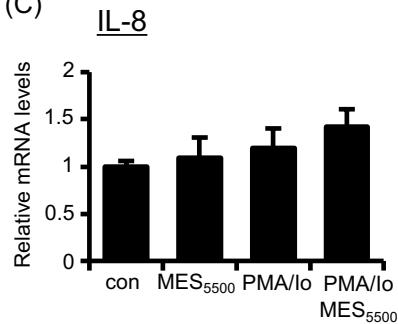

(D)

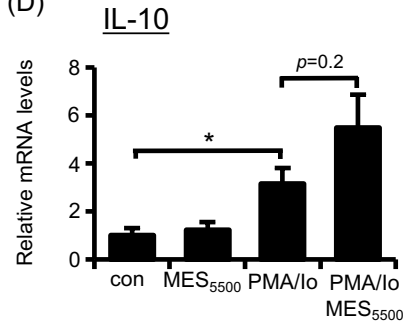

(E)

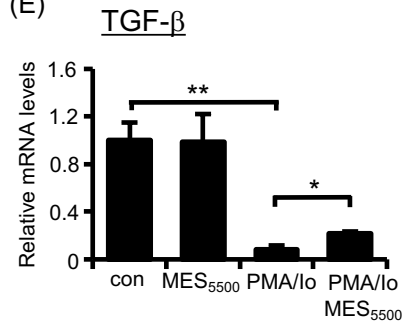

**S8 Fig. MES<sub>5500</sub> treatment in mice does not ameliorate *ex vivo* PMA/Io-induced overexpression of inflammatory cytokines in primary splenocytes.**

(A-E) BALB/c mice were treated with MES<sub>5500</sub> for 30 min. Then mice were euthanized and spleen was collected for splenocyte isolation. Splenocytes were treated with PMA/Io for 3 hr at 37 °C. (A) Schematic diagram of the experimental plan. (B-E) Total RNA was extracted and subjected to quantitative RT-PCR to detect the indicated genes. Data were normalized to the level of 18s mRNA (internal control). Data are presented as mean ± S.D. (n=3 per group). \* $P < 0.05$ , \*\* $P < 0.01$  assessed by Tukey-Kramer test. The data shown are representative of 2 or more independent experiments.
