# Supplementary material for: A novel condition of mild electrical stimulation exerts immunosuppression via hydrogen peroxide production that controls multiple signaling pathway
Source: PubMed Central journal article supplement (PMC7307747; doi:10.1371/journal.pone.0234867), 2020-06-22
Supplement: pone.0234867.s009.pdf [file pone.0234867.s009.pdf]

**S1 Table. Antibodies used for Western blotting**

| <b>1<sup>st</sup> antibody</b> | <b>Vendor (Company)</b>      | <b>Dilution</b> | <b>2<sup>nd</sup> antibody</b>       | <b>Vendor (Company)</b>      | <b>Dilution</b> |
|--------------------------------|------------------------------|-----------------|--------------------------------------|------------------------------|-----------------|
| p50                            | Santa Cruz<br>Biotechnology  | 1:1000          | Mouse monoclonal<br>IgG <sub>1</sub> | Cell Signaling<br>Technology | 1:5000          |
| p65                            | Santa Cruz<br>Biotechnology  | 1:1000          | Mouse monoclonal<br>IgG <sub>1</sub> | Cell Signaling<br>Technology | 1:5000          |
| NFAT                           | Cell Signaling<br>Technology | 1:1000          | Rabbit Ab                            | Cell Signaling<br>Technology | 1:5000          |
| $\gamma$ -Tubulin              | Santa Cruz<br>Biotechnology  | 1:1000          | Mouse monoclonal<br>IgG <sub>1</sub> | Cell Signaling<br>Technology | 1:5000          |
| Actin                          | Santa Cruz<br>Biotechnology  | 1:1000          | Goat polyclonal IgG                  | Santa Cruz<br>Biotechnology  | 1:5000          |
| NRF2                           | Abcam                        | 1:500           | Rabbit polyclonal IgG                | Cell Signaling<br>Technology | 1:1000          |
| HDAC2                          | Santa Cruz<br>Biotechnology  | 1:1000          | Rabbit polyclonal IgG                | Cell Signaling<br>Technology | 1:5000          |
| mTOR                           | Cell Signaling<br>Technology | 1:1000          | Rabbit mAb                           | Cell Signaling<br>Technology | 1:5000          |
| p-mTOR                         | Cell Signaling<br>Technology | 1:1000          | Rabbit Ab                            | Cell Signaling<br>Technology | 1:5000          |
| STAT3                          | Santa Cruz<br>Biotechnology  | 1:1000          | Rabbit polyclonal IgG                | Cell Signaling<br>Technology | 1:5000          |
| p-STAT3                        | Santa Cruz<br>Biotechnology  | 1:1000          | Rabbit polyclonal IgG                | Cell Signaling<br>Technology | 1:5000          |
| GAPDH                          | Santa Cruz<br>Biotechnology  | 1:1000          | Mouse monoclonal<br>IgG <sub>1</sub> | Cell Signaling<br>Technology | 1:5000          |
